# Supplementary material
Source: PubMed Central journal article supplement (PMC4409913)
Supplement: bph0172-2654-sd1.pdf [file bph0172-2654-sd1.pdf]

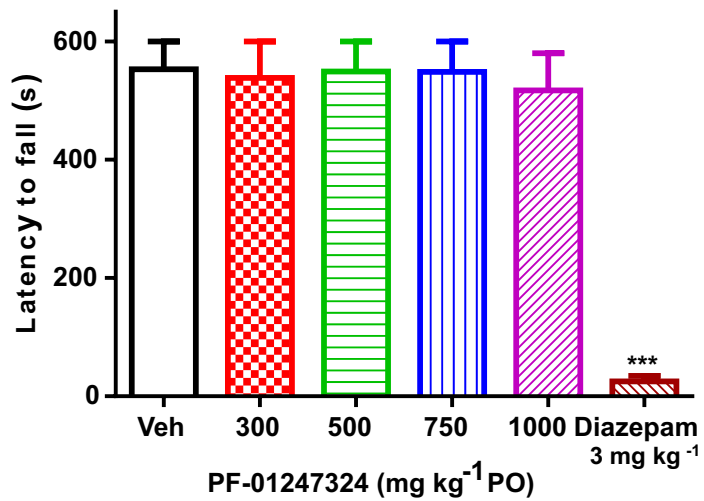

**Supplementary Figure 1. PF-01247324 did not impair motor function.** PF-01247324 was dosed 1 hour prior to rotarod testing  $n = 9-12$  per group. The positive control diazepam was formulated in 10%EtOH/90% (40% PEG 200/60% sterile water) and dosed subcutaneously at  $3 \text{ mg kg}^{-1}$  30 minutes prior to rotarod testing. Rotarod speed was set at 10 rpm. Each mouse was placed on the rotarod and given three opportunities to remain for 10 minutes. The longest lapsed time among the three trials was recorded to the nearest second. PF-01247324 did not significantly alter motor coordination and balance as assessed by the rotarod assay at doses up to  $1000 \text{ mg kg}^{-1}$  when compared to vehicle treated animals. Data shows mean ( $\pm$  SEM). (\*\*\*) $P < 0.0001$ .
