# Supplementary material
Source: PubMed Central journal article supplement (PMC4409913)
Supplement: bph0172-2654-sd3.pdf [file bph0172-2654-sd3.pdf]

|                       |               | Rat TTX-S isoform |          |          |          |
|-----------------------|---------------|-------------------|----------|----------|----------|
|                       | TTX-R rat DRG | rNav1.1           | rNav1.2  | rNav1.6  | rNav1.7  |
| IC <sub>50</sub> (μM) | 0.448         | 10.79             | 8.49     | 8.94     | 11.39    |
| 95 % CI (μM)          | 0.334-0.601   | 8.7-13.3          | 6.6–10.8 | 6.6–12.1 | 9.9–13.1 |

**Supplementary Table 2: Selectivity for PF-01247324 across rat TTX-S isoforms.** The IC<sub>50</sub> for PF-01247324 at recombinantly expressed rat TTX-S isoforms was determined using manual patch electrophysiology. Cells were depolarised from a holding potential of -120 mV to a membrane potential that inactivated half of the available channels for 8 seconds followed by 20 ms recovery at -120 mV and a 20 ms test pulse to 0 mV. n = 4 per recording. Also shown for comparison is the IC<sub>50</sub> for PF-01247324 at TTX-R in rat DRG.
